# Supplementary material
Source: PubMed Central journal article supplement (PMC2587639)
Supplement: 0808952105_0808952105SI.pdf [file 0808952105_0808952105SI.pdf]

# Supporting Information

Ono *et al.* 10.1073/pnas.0808952105

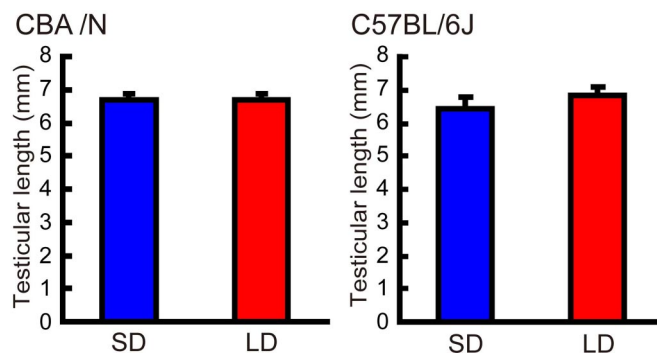

**Fig. S1.** Effect of photoperiod on testicular length in CBA/N and C57BL/6J mice. No significant difference was observed between animals kept under short-day or long-day conditions (Mann-Whitney  $U$  test,  $P > 0.05$ ,  $n = 5$ ).
